# Supplementary material for: Emission trends of air pollutants and CO 2 in China from 2005 to 2021
Source: Copernicus journal article supplement (doi:10.5194/essd-2022-464), 2023-01-10
Supplement: Supplementary file 1 [file Table S1.xlsx]

## Sheet: emission source framework
Emission source framework					Species emission
Source	Subsector	Fuel/Product/Material	Technology		CO2	PM,NOX,SO2	VOCs	NH3
Power plant	coal-fired power	coal	grate boiler		PPCB	PPCB	PPCB	PPCB
			pulverized coal boiler- sub-critical-small <100MW		PPCB	PPCB	PPCB	PPCB
			pulverized coal boiler- sub-critical-middle 100-300MW		PPCB	PPCB	PPCB	PPCB
			pulverized coal boiler- sub-critical-large >=300MW		PPCB	PPCB	PPCB	PPCB
			pulverized coal boiler- super-critical		PPCB	PPCB	PPCB	PPCB
			pulverized coal boiler- ultra-super-critical		PPCB	PPCB	PPCB	PPCB
			fluidized bed combustion boiler		PPCB	PPCB	PPCB	PPCB
			integrated gasification combined cycle		PPCB	PPCB	PPCB	PPCB
	oil-fired power	oil fuel	oil boiler-fuel oil		PPCB	PPCB	PPCB	PPCB
			oil boiler-other oil		PPCB	PPCB	PPCB	PPCB
	gas-fired power	gas fuel	gas boiler		PPCB	PPCB	PPCB	PPCB
	biomass-fired power	biomass fuel	biomass boiler			PPCB	PPCB	PPCB
Industrial boiler	coal-fired boiler	coal	grate boiler		INCB	INCB	INCB
			pulverized coal boiler		INCB	INCB	INCB
			fluidized bed combustion boiler		INCB	INCB	INCB
	oil-fired boiler	diesel	oil boiler-diesel and other oil		INCB	INCB	INCB
		fuel oil	oil boiler-fuel oil		INCB	INCB	INCB
	gas-fired boiler	natural gas	gas boiler-natural gas		INCB	INCB	INCB
		coal gas	gas boiler-coal gas		INCB	INCB	INCB
	biomass-fired boiler	biomass fuel	biomass boiler			INCB	INCB
	other fuel-fired boiler	other fuel	other fuel boiler		INCB	INCB	INCB
Residential combustion	urban heating	coal	residential boiler-coal		DOFU	DOFU	DOFU	DOFU
			stove-coal		DOFU	DOFU	DOFU	DOFU
			stove-briquette		DOFU	DOFU	DOFU	DOFU
		gas fuel	residential boiler-gas		DOFU	DOFU	DOFU
			heater/stove-gas		DOFU	DOFU	DOFU
	rural heating	coal	stove-coal		DOFU	DOFU	DOFU	DOFU
			stove-briquette		DOFU	DOFU	DOFU	DOFU
		biomass fuel	stove-biomass			DOBI	DOBI
	urban cooking & hotwater	coal	stove-coal		DOFU	DOFU	DOFU	DOFU
			stove-briquette		DOFU	DOFU	DOFU	DOFU
		liquefied petroleum gas	stove-LPG		DOFU	DOFU	DOFU
		gas fuel	heater/stove-natural gas		DOFU	DOFU	DOFU
			stove-coal gas		DOFU	DOFU	DOFU
	rural cooking & hotwater	coal	stove-coal		DOFU	DOFU	DOFU	DOFU
			stove-briquette		DOFU	DOFU	DOFU	DOFU
		liquefied petroleum gas	stove-LPG		DOFU	DOFU	DOFU
		biomass fuel	stove-biomass			DOBI	DOBI
			stove-marsh gas			DOBI	DOBI
	Commercial building consumption	coal	commercial boilers/stoves/heaters-coal		DOFU	DOFU	DOFU	DOFU
		liquefied petroleum gas	commercial boilers/stoves/heaters-LPG		DOFU	DOFU	DOFU
		gas fuel	commercial boilers/stoves/heaters-natural gas		DOFU	DOFU	DOFU
			commercial boilers/stoves/heaters-coal gas		DOFU	DOFU	DOFU
Transport	on-road vehicle-pipe	gasoline	heavy duty truck-gasoline		TRON	TRON	TRON	TRON
			mid-duty truck-gasoline		TRON	TRON	TRON	TRON
			light duty truck-gasoline		TRON	TRON	TRON	TRON
			heavy duty passenger vehicle-diesel		TRON	TRON	TRON	TRON
			mid-duty passenger vehicle-diesel		TRON	TRON	TRON	TRON
			light duty passenger vehicle-diesel		TRON	TRON	TRON	TRON
			taxi		TRON	TRON	TRON	TRON
			motorcycle		TRON	TRON	TRON	TRON
		diesel	heavy duty truck-diesel		TRON	TRON	TRON	TRON
			mid-duty truck-diesel		TRON	TRON	TRON	TRON
			light duty truck-diesel		TRON	TRON	TRON	TRON
			bus-diesel		TRON	TRON	TRON	TRON
			heavy duty passenger vehicle-diesel		TRON	TRON	TRON	TRON
			mid-duty passenger vehicle-diesel		TRON	TRON	TRON	TRON
			light duty passenger vehicle-diesel		TRON	TRON	TRON	TRON
		compressed natural gas	heavy duty bus-compressed natural gas		TRON	TRON	TRON	TRON
	on-road vehicle-evaporation	gasoline	heavy duty truck-gasoline		TRON	TRON	TRON	TRON
			mid-duty truck-gasoline		TRON	TRON	TRON	TRON
			light duty truck-gasoline		TRON	TRON	TRON	TRON
			heavy duty passenger vehicle-gasoline		TRON	TRON	TRON	TRON
			mid-duty passenger vehicle-gasoline		TRON	TRON	TRON	TRON
			light duty passenger vehicle-gasoline		TRON	TRON	TRON	TRON
			taxi		TRON	TRON	TRON	TRON
			motorcycle		TRON	TRON	TRON	TRON
	off-road machine	agriculture machine	tractor		TROF	TROF	TROF
			agriculture truck		TROF	TROF	TROF
			agricultural machine		TROF	TROF	TROF
		construction machine	construction machine		TROF	TROF	TROF
		railway transport	inner-combustion locomotive-diesel		TROF	TROF	TROF
		inland waterway transport	inland waterways-diesel		TROF	TROF	TROF
			inland waterways-fuel oil		TROF	TROF	TROF
Open burning	Straw burning	crop straw	open burning of straw			OPEN	OPEN	OPEN
	forest and grassland fire	forest	open fire of forest			OPEN	OPEN	OPEN
		shrub	open fire of shrub			OPEN	OPEN	OPEN
		grassland	open fire of grassland			OPEN	OPEN	OPEN
Industrial process	iron and steel smelting	sinter	sintering machine		PRIR	PRIR	PRIR
		pellet	pellet machine		PRIR	PRIR	PRIR
		pig iron	blast furnace		PRIR	PRIR	PRIR
		crude steel	basic oxygen furnace		PRIR	PRIR	PRIR
			electric arc furnace		PRIR	PRIR	PRIR
		steel ingot	casting			PRIR
		rolled steel	hot rolling			PRIR	PRIR
			cold rolling			PRIR
	non-ferrous metal smelting	alumina	Bayer process			PROT
			Bayer sintering process		PROT	PROT
		electrolytic aluminium	electrolytic aluminium production		PROT	PROT
		copper	rich-oxygen pool smelting process			PROT
			other copper smelting techniques			PROT
		lead	rich-oxygen pool smelting process		PROT
			imperial sinter process		PROT
			sinter machine process		PROT
			sinter pan or pot process		PROT
		zinc	electrolytic process
			imperial smelting process		PROT
			electric furnace smelting process
			retort zinc smelting process		PROT
			artisanal zinc smelting
	cement production	cement clinker	shaft kiln		PRCE	PRCE	PRCE
			rotary kiln		PRCE	PRCE	PRCE
			new dry clinker firing- small <2000t/d		PRCE	PRCE	PRCE
					PRCE	PRCE	PRCE
					PRCE	PRCE	PRCE
		cement	shaft kiln cement grinding			PRCE
			rotary kiln cement grinding			PRCE
			new dry cement grinding			PRCE
	other building material production	plate glass	vertical process		PROT	PROT	PROT
			float process		PROT	PROT	PROT
		brick	brick production		PROT	PROT	PROT
		lime	lime production		PROT	PROT	PROT
		ceramic	building ceramic production		PROT	PROT	PROT
			sanitary ceramic production		PROT	PROT	PROT
	coking	coke	indigenous coke oven		PROT	PROT	PROT
			machine coke oven		PROT	PROT	PROT
	petroleum processing	crude oil	refinery		PROT	PROT	PROT
		ethylene	ethylene production		PROT	PROT	PROT
	chemical production	ammonia	ammonia synthesis from coal		PROT	PROT	PROT	PROT
			ammonia synthesis from oil & natural gas		PROT	PROT	PROT	PROT
		caustic soda	diaphragm process		PROT	PROT	PROT
			ion-exchange membrane process		PROT	PROT	PROT
			mercury-based process		PROT	PROT	PROT
		soda	combined-soda process		PROT	PROT	PROT
			ammonia-soda process		PROT	PROT	PROT
		sulfuric acid	sulfuric acid production			PROT	PROT
		nitric acid	dual-pressure process			PROT
			other process			PROT
		nitrogen fertilizer	nitrogen fertilizer production					PROT
		calcium carbide	calcium carbide production		PROT
	petroleum and natural gas extraction	crude oil	extraction of crude oil				PROT
		natural gas	extraction of natural gas				PROT
	agricultural products and by-products processing	feed	mixed feed				PROT
		edible vegetable oil	solvent extraction				PROT
			grain crushing				PROT
		sugar	cane sugar				PROT
			beet sugar				PROT
	food manufacturing	pastry	pastry				PROT
		biscuit	biscuit				PROT
	wine manufacturing	wine	beer				PROT
			wine				PROT
			spirit				PROT
	wood processing	charcoal	charcoal				PROT
	Pulp manufacturing	paper pulp	paper pulp				PROT
	petroleum processing	carbon black	carbon black production		PROT		PROT
	paint/ink/pigment manufacturing	solvent coating	solvent based coating production				PROT
		ink	printing ink production				PROT
		adhesive	adhesive production				PROT
	synthetic materials manufacturing	synthetic resin	high density polyethylene				PROT
			low density polyethylene				PROT
			polyvinyl chloride				PROT
			polypropylene				PROT
			polystyrene				PROT
		Synthetic fibre polymer	polyester				PROT
		synthetic ruber	synthetic rubber				PROT
	medicine manufacturing	chemical raw medicine	chemical raw medicine				PROT
	chemical fiber manufacturing	artificial fiber	viscose fiber				PROT
		synthetic fibre	polyamide fiber				PROT
			polyester fiber				PROT
			pan fiber				PROT
			polypropylene fiber				PROT
			vinylon fiber				PROT
	plastic product manufacturing	rubber products	auto tyre				PROT
			other rubber products production				PROT
		plastic products	foam production				PROT
			other plastic production				PROT
Solvent	building paint	external wall	solvent-based paint				PRSO
			water-based paint				PRSO
		interior wall	water-based paint				PRSO
		waterproof paint	environment friendly paint				PRSO
			solvent-based paint				PRSO
		fireproof/floor paint	water-based paint				PRSO
			solvent-based paint				PRSO
		anticorrosive paint	water-based paint				PRSO
			solvent-based paint				PRSO
	non-building paint	wood paint	solvent-based paint				PRSO
			water-based paint				PRSO
			UV paint				PRSO
		vehicle manufacture paint	solvent-based paint				PRSO
			water-based paint				PRSO
		vehicle refinishing paint	solvent-based paint				PRSO
			water-based paint				PRSO
		container paint	solvent-based paint				PRSO
			water-based paint				PRSO
		marine production paint	solvent-based paint				PRSO
			water-based paint				PRSO
		other heavy anticorrosive paint	solvent-based paint				PRSO
			water-based paint				PRSO
	printing ink usage	gravure ink	water-based ink				PRSO
			solvent-based ink				PRSO
		offset printing ink	integrated ink				PRSO
		flexo printing ink	water-based ink				PRSO
			solvent-based ink				PRSO
		screen printing ink	screen printing ink				PRSO
		UV printing ink	UV printing ink				PRSO
		other ink	other ink				PRSO
	adhesive usage	building adhesive	water-based adhesive				PRSO
			solvent-based adhesive				PRSO
		shoe manufacture adhesive	water-based adhesive				PRSO
			solvent-based adhesive				PRSO
		vehicle manufacture adhesive	water-based adhesive				PRSO
			solvent-based adhesive				PRSO
		wood adhesive	water-based adhesive				PRSO
			solvent-based adhesive				PRSO
		package printing adhesive	water-based adhesive				PRSO
			solvent-based adhesive				PRSO
		other adhensive	water-based adhesive				PRSO
			solvent-based adhesive				PRSO
	other industrial solvent usage	industrial cleaning agent	water-based agent				PRSO
			solvent-based agent				PRSO
		asphalt	road maintenance used asphalt				PRSO
			new road used asphalt				PRSO
	pesticide	insecticide	insecticide				DOSO
		herbicide	glyphosate				DOSO
			other herbicide				DOSO
		bactericide	kitazine				DOSO
			other bactericide				DOSO
	other residential solvent usage	dry cleaning agent	dry cleaning agent				DOSO
		cosmetic	personal care product				DOSO
			oral care product				DOSO
			household detergent				DOSO
			perfume				DOSO
Oil storage and transportation	crude oil storage and transportation	storage of crude oil	storage in oil field				PROT
			storage in port				PROT
			storage in tansfer station				PROT
			storage in refinery				PROT
		transport of crude oil	transport out of oil field				PROT
			transport out of port				PROT
			transport out of tansfer station（to refinery)				PROT
			transport into tansfer station (from oil field)				PROT
			transport into port				PROT
			transport into refinery				PROT
	gasoline storage and transportation	storage of gasoline	storage in tansfer station				PROT
			storage in refinery				PROT
			storage in service station-vehicle gasoline				PROT
			storage in service station-other gasoline				PROT
		transport of gasoline	transport out of tansfer station（to service station)				PROT
			transport out of refinery				PROT
			transport into tansfer station (from refinery)				PROT
	diesel storage and transportation	storage of diesel	storage in tansfer station				PROT
			storage in refinery				PROT
			storage in service station-vehicle diesel				PROT
			storage in service station-other diesel				PROT
		transport diesel	transport out of tansfer station（to service station)				PROT
			transport out of refinery				PROT
			transport into tansfer station (from refinery)				PROT
Waste treatment	wastewater treatment	municipal wastewater	wastewater treatment				DOTH
	solid waste disposal	municipal solid waste	MSW sanitary landfill				DOTH
			MSW compost				DOTH
			MSW incineration		DOTH		DOTH
		hazardous waste	hazardous waste incineration		DOTH
		sludge	sludge incineration		DOTH
	human waste disposal	urban population	urban toilet					DOTH
		rural population	rural toilet					DOTH
Agriculture	livestock	cattle	breeding stock of cow					AGRL
			breeding stock of other cattle					AGRL
		sheep	breeding stock of sheep					AGRL
		pig	slaughter stock of pig					AGRL
		poultry	slaughter stock of poultry					AGRL
		horse	breeding stock of horse					AGRL
		donkey	breeding stock of donkey					AGRL
		mule	breeding stock of mule					AGRL
		rabbit	slaughter stock of rabbit					AGRL
	nitrogen fertilizer application	nitrogen fertilizer	urea					AGRF
			ammonium bicarbonate					AGRF
			other N fertilizer					AGRF
		compound fertilizer	diammonium compound fertilizer					AGRF
			three element compound fertilizer					AGRF
Other sources	smoke	smoke population	smoke			DOTH	DOTH
	cook	cook	cook			DOTH	DOTH
