# Supplementary material for: Emission trends of air pollutants and CO 2 in China from 2005 to 2021
Source: Copernicus journal article supplement (doi:10.5194/essd-2022-464), 2023-01-10
Supplement: Supplementary file 3 [file essd-2022-464-supplement.zip]

Archive with 2 entries (2 files):
- Supplement.pdf
- Table S1.xlsx
