# Supplementary material for: Emission trends of air pollutants and CO 2 in China from 2005 to 2021
Source: Copernicus journal article supplement (doi:10.5194/essd-2022-464), 2023-01-10
Supplement: Supplementary file 3 [file essd-2022-464-supplement.zip › Supplement.pdf]

Emission trends of air pollutants and CO<sub>2</sub> in China from 2005 to 2021

Shengyue Li<sup>1,2</sup>, Shuxiao Wang<sup>1,2</sup>, Qingru Wu<sup>1,2</sup>, Yanning Zhang<sup>1,2</sup>, Daiwei Ouyang<sup>1,2</sup>, Haotian Zheng<sup>1,2</sup>,  
5 Licong Han<sup>1,2</sup>, Xionghui Qiu<sup>3</sup>, Yifan Wen<sup>1,2</sup>, Min Liu<sup>1,2</sup>, Yueqi Jiang<sup>1,2</sup>, Dejie Yin<sup>1,2</sup>, Kaiyun Liu<sup>1,2</sup>, Bin  
Zhao<sup>1,2</sup>, Shaojun Zhang<sup>1,2</sup>, Ye Wu<sup>1,2</sup>, Jiming Hao<sup>1,2</sup>

<sup>1</sup> State Key Joint Laboratory of Environmental Simulation and Pollution Control, School of Environment, Tsinghua  
University, Beijing, 100084, China

<sup>2</sup> State Environmental Protection Key Laboratory of Sources and Control of Air Pollution Complex, Beijing 100084, China

10 <sup>3</sup> School of Environment, Beijing Jiaotong University, Beijing 100044, China

Correspondence to: Shuxiao Wang (shxwang@tsinghua.edu.cn)

Table caption list

- 15 Table S1. Emission source framework of ABaCAS-EI v2.0 dataset.  
Table S2. Major data sources of activity data of different emission sources.  
Table S3. References of emission factors for calculating air pollutant emissions.  
Table S4. Comparison of considered emission sources of CO<sub>2</sub> between this study and other public datasets.

Figure caption list

- 20 Figure S1: Comparison of China’s emission inventories compiled in this study and in other studies.  
Figure S2: Major Sectoral contributions on air pollutants and CO<sub>2</sub> emissions in 2005, 2013 and 2021 in China.  
Figure S3: Spatial distribution of grid (27 km×27 km) air pollutants and CO<sub>2</sub> emissions in 2021 in China.

**Table S2. Major data sources of activity data of different emission sources.**

| Emission sources               | Activity data             | Major data sources                                                                                                                                                                                                                                                                                                                                                                                                  |
|--------------------------------|---------------------------|---------------------------------------------------------------------------------------------------------------------------------------------------------------------------------------------------------------------------------------------------------------------------------------------------------------------------------------------------------------------------------------------------------------------|
| Power plant                    | Fuel consumption          | China Energy Statistical Yearbook<br>Compendium of statistical data on the electric power industry                                                                                                                                                                                                                                                                                                                  |
| Industrial boiler              | Fuel consumption          | China Energy Statistical Yearbook<br>China's Environmental Statistics (not publicly released)<br>Industrial investigation (not publicly released)                                                                                                                                                                                                                                                                   |
| Residential combustion         | Fuel consumption          | China Energy Statistical Yearbook<br>China Statistical Yearbook                                                                                                                                                                                                                                                                                                                                                     |
| Transport                      | Vehicle population        | China Statistical Yearbook<br>China Transportation Statistical Yearbook                                                                                                                                                                                                                                                                                                                                             |
|                                | Fuel consumption          | China Energy Statistical Yearbook<br>International Energy Agency dataset ( <a href="https://www.iea.org/">https://www.iea.org/</a> , last access: 8 November 2022)                                                                                                                                                                                                                                                  |
| Open burning                   | Biomass consumption       | China Statistical Yearbook<br>Satellite observation product of MODIS burned area (MCD64A1; <a href="http://modis-fire.umd.edu/">http://modis-fire.umd.edu/</a> , last access: 8 November 2022)                                                                                                                                                                                                                      |
| Industrial process             | Industrial product output | China Statistical Yearbook<br>China Industrial Statistics Yearbook<br>China Iron and Steel Industry Yearbook<br>China Nonferrous Metal Yearbook<br>China Building Materials Industry Yearbook<br>China Chemical Industry Yearbook<br>China's Environmental Statistics (not publicly released)<br>Industrial investigation (not publicly released)<br>China Light Industry Yearbook<br>China Paint Industry Yearbook |
| Solvent                        | Solvent consumption       | China Coating Industry Association dataset ( <a href="https://www.chinacoatingnet.com/index2.php">https://www.chinacoatingnet.com/index2.php</a> , last access: 8 November 2022)<br>China adhesives and tape industry association dataset ( <a href="https://www.catia-china.com/">https://www.catia-china.com/</a> , last access: 8 November 2022)                                                                 |
| Oil storage and transportation | Oil production and sales  | China Energy Statistical Yearbook                                                                                                                                                                                                                                                                                                                                                                                   |
| Waste treatment                | Waste disposal volume     | China Environmental Statistical Yearbook                                                                                                                                                                                                                                                                                                                                                                            |
| Agriculture                    | Livestock stocking        | Chinese Animal Husbandry and Veterinary Yearbook                                                                                                                                                                                                                                                                                                                                                                    |
|                                | Fertilizer application    | China Rural Statistical Yearbook<br>Compendium of cost and income data of national agricultural products                                                                                                                                                                                                                                                                                                            |

**Table S3. References of emission factors for calculating air pollutant emissions.**

| Emission sources                       | References                                              |
|----------------------------------------|---------------------------------------------------------|
| Powerplant and industrial sectors      | Zhao (2008); Zheng et al. (2019)                        |
| Residential combustion                 | Li et al. (2009); Wang et al. (2009); Cai et al. (2018) |
| On-road vehicle                        | (Zhang, 2014; Wen et al., 2021)                         |
| Open burning                           | Li et al. (2007); Qiu et al. (2016)                     |
| Solvent and other VOCs-related sectors | Wei et al. (2008); Chang et al. (2022)                  |
| NH <sub>3</sub> emission sectors       | Dong et al. (2010)                                      |
| Other sectors                          | Tian (2003); Lei (2008); Zhang (2008); Fu et al. (2013) |

**Table S4. Comparison of considered emission sources of CO<sub>2</sub> between this study and other public datasets.**

| Source    | Subsector                  | This study <sup>a</sup> | MEIC <sup>b</sup> | CHRED | CEDS <sup>c</sup> | EDGAR <sup>d</sup> | IEA |
|-----------|----------------------------|-------------------------|-------------------|-------|-------------------|--------------------|-----|
| Power     | Power plant                | √                       | √                 | √     | √                 | √                  | √   |
| Industry  |                            |                         | √                 |       |                   |                    |     |
|           | Industrial boiler          | √                       |                   | √     | √                 | √                  | √   |
|           | Iron and steel smelting    | √                       |                   | √     | √                 | √                  | √   |
|           | Cement production          | √                       |                   | √     | √                 | √                  | √   |
|           | Coke production            | √                       |                   |       | √                 | √                  | √   |
|           | Non-ferrous metal smelting | √                       |                   |       | √                 |                    | √   |
|           | Plate glass production     | √                       |                   |       | √                 | √                  | √   |
|           | Brick production           | √                       |                   |       |                   |                    |     |
|           | Lime production            | √                       |                   |       | √                 | √                  | √   |
|           | Ceramic production         | √                       |                   |       | √                 |                    | √   |
|           | Crude oil processing       | √                       |                   |       | √                 |                    | √   |
|           | Ethylene production        | √                       |                   |       | √                 |                    | √   |
|           | Ammonia production         | √                       |                   |       | √                 |                    | √   |
|           | Caustic soda production    | √                       |                   |       |                   |                    |     |
|           | Soda production            | √                       |                   |       |                   |                    |     |
|           | Calcium carbide production | √                       |                   |       |                   |                    |     |
|           | Carbon black production    | √                       |                   |       |                   |                    |     |
| Resident  |                            |                         | √                 |       |                   |                    |     |
|           | Residential combustion     | √                       |                   |       | √                 | √                  | √   |
|           | Solid waste incineration   | √                       |                   |       | √                 | √                  | √   |
| Transport |                            |                         | √                 |       |                   |                    |     |
|           | On-road vehicle            | √                       |                   | √     | √                 | √                  | √   |
|           | Agricultural machinery     | √                       |                   | √     | √                 | √                  | √   |
|           | Construction machinery     | √                       |                   |       | √                 | √                  | √   |
|           | Railway                    | √                       |                   | √     | √                 | √                  | √   |
|           | Inland waterway            | √                       |                   | √     | √                 | √                  | √   |
|           | International shipping     |                         |                   | √     | √                 | √                  | √   |
|           | Aviation                   |                         |                   | √     | √                 | √                  | √   |

a: CO<sub>2</sub> emissions in our studies have considered both those from the energy consumption processes such as fuel combustion in power plant, and those from the non-energy consumption processes such as carbonate decomposition during building material production.

b: CO<sub>2</sub> emissions from four broad sources are shared in the public MEIC dataset, without detailed subsector information.

c: CO<sub>2</sub> emissions of CEDS dataset are basically related to the energy consumption processes calculated based on the IEA energy statistics.

d: CO<sub>2</sub> emissions of EDGAR dataset also include those from the energy consumption processes calculated based on the IEA energy statistics, and some emissions from part of non-energy processes, such as the lime and glass production processes.

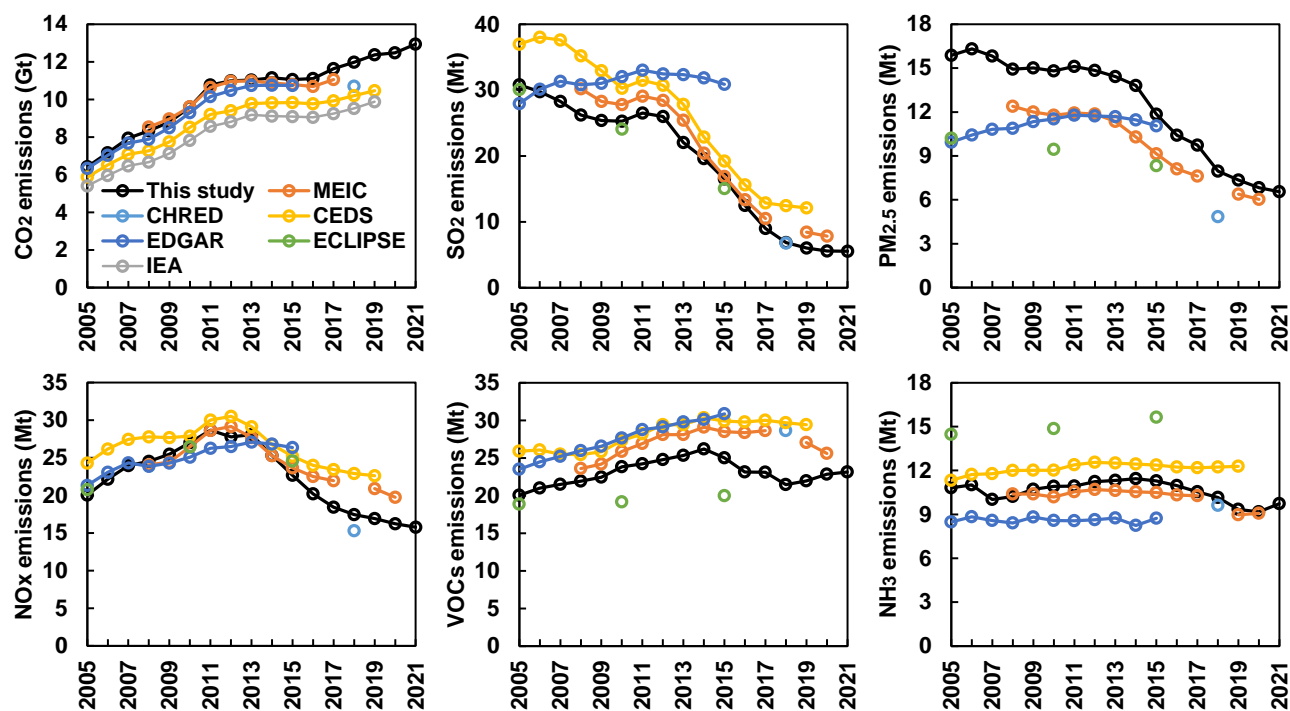

Figure S1: Comparison of China's emission inventories compiled in this study and in other studies.

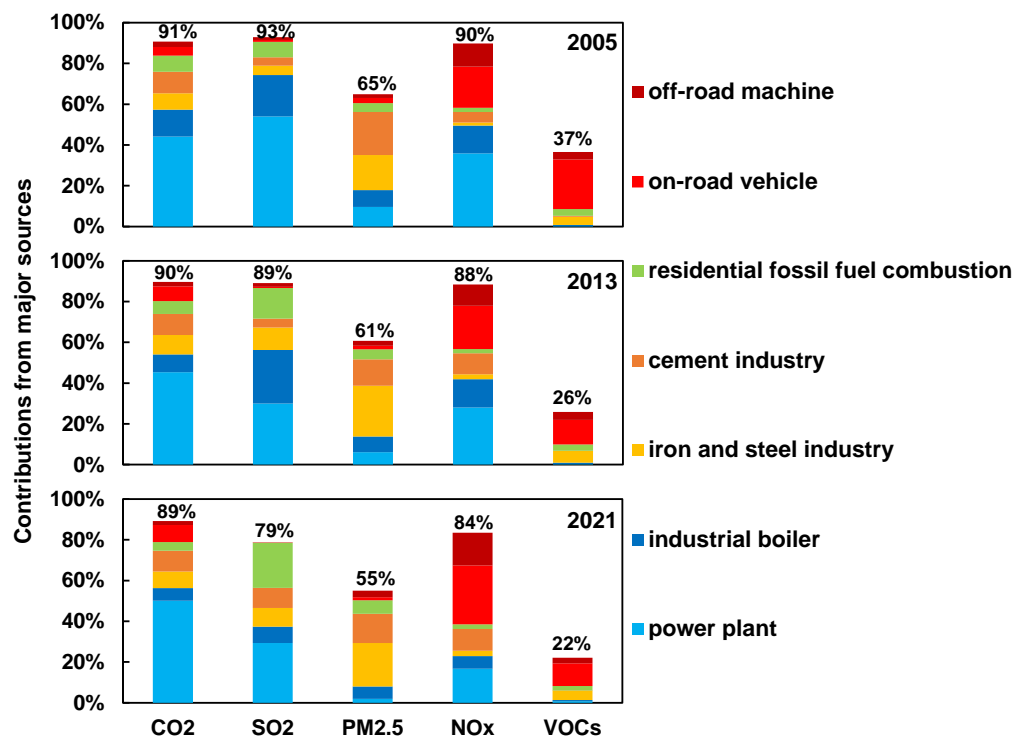

Figure S2: Major Sectoral contributions on air pollutants and CO<sub>2</sub> emissions in 2005, 2013 and 2021 in China.

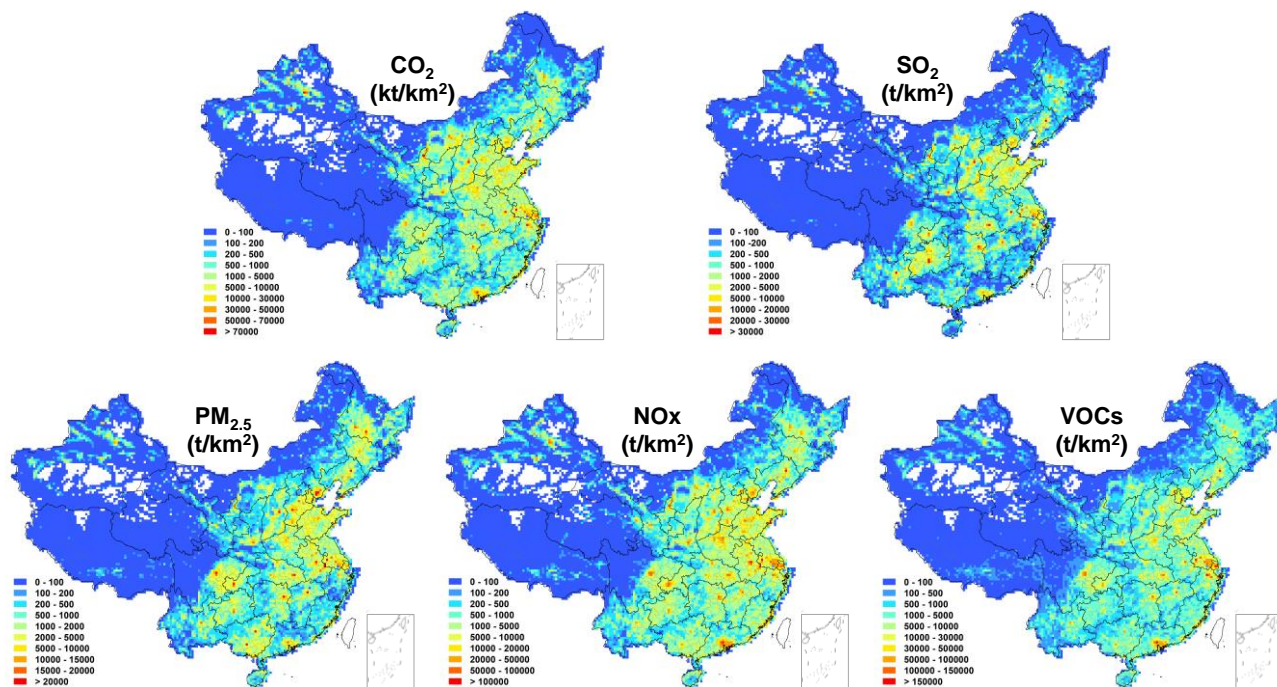

50 Figure S3: Spatial distribution of grid (27 km×27 km) air pollutants and  $\text{CO}_2$  emissions in 2021 in China.

## References

- Cai, S., Li, Q., Wang, S., Chen, J., Ding, D., Zhao, B., Yang, D., and Hao, J.: Pollutant emissions from residential combustion and reduction strategies estimated via a village-based emission inventory in Beijing, *Environ. Pollut.*, 238, 230-237, <https://doi.org/10.1016/j.envpol.2018.03.036>, 2018.
- Chang, X., Zhao, B., Zheng, H., Wang, S., Cai, S., Guo, F., Gui, P., Huang, G., Wu, D., Han, L., Xing, J., Man, H., Hu, R., Liang, C., Xu, Q., Qiu, X., Ding, D., Liu, K., Han, R., Robinson, A. L., and Donahue, N. M.: Full-volatility emission framework corrects missing and underestimated secondary organic aerosol sources, *One Earth*, 5, 403-412, <https://doi.org/10.1016/j.oneear.2022.03.015>, 2022.
- Dong, W., Xing, J., and Wang, S.: Temporal and spatial distribution of anthropogenic ammonia emissions in China: 1994-2006, *Environ. Sci.*, 31, 1457-1463, <https://doi.org/10.13227/j.hjlx.2010.07.008>, 2010.
- Fu, X., Wang, S., Zhao, B., Xing, J., Cheng, Z., Liu, H., and Hao, J.: Emission inventory of primary pollutants and chemical speciation in 2010 for the Yangtze River Delta region, China, *Atmos. Environ.*, 70, 39-50, <https://doi.org/10.1016/j.atmosenv.2012.12.034>, 2013.
- Lei, Y.: Research on anthropogenic emissions and control of primary particles and its key chemical components, Ph.D. thesis, School of Environment, Tsinghua University, Beijing, 2008.
- Li, X., Wang, S., Duan, L., Hao, J., and Nie, Y.: Carbonaceous aerosol emissions from household biofuel combustion in China, *Environ. Sci. Technol.*, 43, 6076-6081, <https://doi.org/10.1021/es803330j>, 2009.
- Li, X., Wang, S., Duan, L., Hao, J., Li, C., Chen, Y., and Yang, L.: Particulate and trace gas emissions from open burning of wheat straw and corn stover in China, *Environ. Sci. Technol.*, 41, 6052-6058, <https://doi.org/10.1021/es0705137>, 2007.
- Qiu, X., Duan, L., Chai, F., Wang, S., Yu, Q., and Wang, S.: Deriving high-resolution emission inventory of open biomass burning in China based on satellite observations, *Environ. Sci. Technol.*, 50, 11779-11786, <https://doi.org/10.1021/acs.est.6b02705>, 2016.
- Tian, H.: Studies on present and future emissions of nitrogen oxides and its comprehensive control policies in China, Ph.D. thesis, School of Environment, Tsinghua University, Beijing, 2003.
- Wang, S., Wei, W., Du, L., Li, G., and Hao, J.: Characteristics of gaseous pollutants from biofuel-stoves in rural China, *Atmos. Environ.*, 43, 4148-4154, <https://doi.org/10.1016/j.atmosenv.2009.05.040>, 2009.
- Wei, W., Wang, S., Chatani, S., Klimont, Z., Cofala, J., and Hao, J.: Emission and speciation of non-methane volatile organic compounds from anthropogenic sources in China, *Atmos. Environ.*, 42, 4976-4988, <https://doi.org/10.1016/j.atmosenv.2008.02.044>, 2008.
- Wen, Y., Zhang, S., He, L., Yang, S., Wu, X., and Wu, Y.: Characterizing start emissions of gasoline vehicles and the seasonal, diurnal and spatial variabilities in China, *Atmos. Environ.*, 245, 10.1016/j.atmosenv.2020.118040, 2021.
- Zhang, C.: Studies on Present and Future Emissions of PM, SO<sub>2</sub>, NO<sub>x</sub>, MA.Eng thesis, School of Environment, Tsinghua University, Beijing, 2008.

- Zhang, S.: Characteristics and control strategies of vehicle emissions in typical cities of China, Ph.D. thesis, School of Environment, Tsinghua University, Beijing, 2014.
- Zhao, Y.: Study on air pollutant emission of coal-fired power plants in China and its environmental impacts, Ph.D. thesis, School of Environment, Tsinghua University, Beijing, 2008.
- 90 Zheng, H., Cai, S., Wang, S., Zhao, B., Chang, X., and Hao, J.: Development of a unit-based industrial emission inventory in the Beijing–Tianjin–Hebei region and resulting improvement in air quality modeling, *Atmos. Chem. Phys.*, 19, 3447–3462, <https://doi.org/10.5194/acp-19-3447-2019>, 2019.
