# Supplementary material for: Emission trends of air pollutants and CO 2 in China from 2005 to 2021
Source: Copernicus journal article supplement (doi:10.5194/essd-2022-464), 2023-01-10
Supplement: Supplementary file [file essd-2022-464-AC2-supplement.pdf]

**Dear reviewer,**

Thanks a lot for your recognition and the valuable suggestions!

**This file shows all the revised and supplementary figures and tables mentioned in the response text.**

All the corrections and responses will be incorporated into the new revised manuscript (manuscript\_R1). If further responses and corrections should be made, please don't hesitate to let me know.

Yours Sincerely

Corresponding author

Prof. Shuxiao Wang

School of Environment, Tsinghua University

Beijing 100084, P.R. China

Tel & Fax: 86-10-6277-1466

E-mail: [shxwang@tsinghua.edu.cn](mailto:shxwang@tsinghua.edu.cn)

**Table caption list**

Table R1: Comparison of research contents among similar studies.

Table R2: Information list of ABaCAS-EI v2.0 dataset.

Table R3: Example data of end-of-pipe measures in power plant in China in 2020.

Table R4 (Table S2 in supplement\_R1): Major data sources of activity data of different emission sources.

**Figure caption list**

Figure R1 (Figure S1 in supplement\_R1): Comparison of China's emission inventories compiled in this study and in other studies.

Table R1: Comparison of research contents among similar studies.

| Elements         |                                 | This study                                                              | Zheng et al. (2018) | Gao et al. (2022)   | Zhang et al. (2022)                                         |
|------------------|---------------------------------|-------------------------------------------------------------------------|---------------------|---------------------|-------------------------------------------------------------|
| Dataset          |                                 | ABaCAS-EI                                                               | MEIC                | CHRED 3.0A          | China Environment Yearbook, CHRED                           |
| Time             |                                 | 2005-2021                                                               | 2010-2017           | 2018                | 2012-2018                                                   |
| Spatial scale    |                                 | province<br>city                                                        | nation              | city<br>grid (10km) | city                                                        |
| Sector           |                                 | 15 subsectors                                                           | 5 sectors           | 21 subsectors       | NA                                                          |
| Historical trend | reduction measures              | structure adjustment<br>energy & material saving<br>end-of-pipe control | end-of-pipe control | NA                  | energy use<br>technological progress<br>end-of-pipe control |
|                  | co-control achievement          | sector<br>province/city                                                 | NA                  | NA                  | city                                                        |
| Future priority  | potential synergistic reduction | sector<br>province/city<br>measure                                      | NA                  | grid                | measure                                                     |

NA: not analyzed

Table R2: Information list of ABaCAS-EI v2.0 dataset.

| NO. | Type   | Content                                                                                        |
|-----|--------|------------------------------------------------------------------------------------------------|
| 1   | Text   | Profile of emission inventory and research team                                                |
| 2   | Text   | Emission source framework                                                                      |
| 3   | Text   | Emission inventory methodology                                                                 |
| 4   | Text   | Basic data sources                                                                             |
| 5   | Data   | Example data of activity level                                                                 |
| 6   | Data   | Example data of emission factor                                                                |
| 7   | Data   | Example data of reduction measure application ratio and efficiency                             |
| 8   | Data   | Air pollutants and CO <sub>2</sub> emissions during 2005–2021 by species, sector, and province |
| 9   | Figure | Example figure of emission trend in China from 2005 to 2021                                    |
| 10  | Figure | Example figure of gird emissions in 2021 in China                                              |
| 11  | Figure | Example figure of source contributions in 2021 in China                                        |

Table R3: Example data of end-of-pipe measures in power plant in China in 2020.

| Source      | Sector           | Fuel | Technology                                    | Measure type | Removal species   | Measure name <sup>a</sup> | Application ratio | Removal efficiency |     |
|-------------|------------------|------|-----------------------------------------------|--------------|-------------------|---------------------------|-------------------|--------------------|-----|
| Power plant | Coal-fired power | Coal | pulverized coal boiler - sub critical >=300MW | End-of-pipe  | SO <sub>2</sub>   | FGD                       | 100%              | 96%                |     |
|             |                  |      |                                               |              |                   | LNB-SCR                   | 97%               | 88%                |     |
|             |                  |      |                                               |              |                   | NO <sub>x</sub>           | LNB-SNCR          | 3%                 | 71% |
|             |                  |      |                                               |              |                   | LNB                       | 0%                | 59%                |     |
|             |                  |      |                                               |              | PM <sub>2.5</sub> | ESP-FF                    | 36.3%             | 99.8%              |     |
|             |                  |      |                                               |              |                   | LTESP-WESP                | 28.6%             | 98.95%             |     |
|             |                  |      |                                               |              |                   | FF                        | 5.2%              | 99%                |     |
|             |                  |      |                                               |              |                   | LTESP                     | 27.5%             | 97.26%             |     |
| ESP         | 2.3%             | 93%  |                                               |              |                   |                           |                   |                    |     |

a: FGD, flue gas desulfurization; LNB, low nitrogen combustion technology; SCR, selective catalytic reduction; SNCR, selective non-catalytic reduction; ESP-FF, electrostatic and fabric composite filter; LTESP, low temperature electrostatic precipitator; WESP, wet electrostatic precipitator.

Table R4 (Table S2 in supplement\_R1): Major data sources of activity data of different emission sources.

| Emission sources       | Activity data             | Major data sources <sup>a</sup>                                                                                                                                                                                                                                                                                                                                                                                                                                                                                                                                                                                          |
|------------------------|---------------------------|--------------------------------------------------------------------------------------------------------------------------------------------------------------------------------------------------------------------------------------------------------------------------------------------------------------------------------------------------------------------------------------------------------------------------------------------------------------------------------------------------------------------------------------------------------------------------------------------------------------------------|
| Power plant            | Fuel consumption          | China Energy Statistical Yearbook, section 6: Regional Energy Balance Sheets<br>Compendium of statistical data on the electric power industry, Table 2-2: Electricity generation by region                                                                                                                                                                                                                                                                                                                                                                                                                               |
| Industrial boiler      | Fuel consumption          | China Energy Statistical Yearbook, section 6: Regional Energy Balance Sheets<br>China's Environmental Statistics (not publicly released)<br>Industrial investigation (not publicly released)                                                                                                                                                                                                                                                                                                                                                                                                                             |
| Residential combustion | Fuel consumption          | China Energy Statistical Yearbook, section 6: Regional Energy Balance Sheets<br>China Statistical Yearbook, Table 14-23: Building areas                                                                                                                                                                                                                                                                                                                                                                                                                                                                                  |
| Transport              | Vehicle population        | China Statistical Yearbook, Table 16-20: Civil vehicle population<br>China Transportation Statistical Yearbook, Table: Public transport population                                                                                                                                                                                                                                                                                                                                                                                                                                                                       |
|                        | Fuel consumption          | China Energy Statistical Yearbook, section 6: Regional Energy Balance Sheets<br>International Energy Agency dataset: <a href="https://www.iea.org/">https://www.iea.org/</a> (last access: 8 November 2022)                                                                                                                                                                                                                                                                                                                                                                                                              |
| Open burning           | Biomass consumption       | China Statistical Yearbook, Table 12-10: Major agricultural products production<br>Satellite observation product of MODIS burned area: MCD64A1, <a href="http://modis-fire.umd.edu/">http://modis-fire.umd.edu/</a> (last access: 8 November 2022)                                                                                                                                                                                                                                                                                                                                                                       |
| Industrial process     | Industrial product output | China Statistical Yearbook, Table 13-13: Industrial products output by region<br>China Industrial Statistics Yearbook, Table 3-55: Industrial products output by region<br>China Iron and Steel Industry Yearbook, Table 7: Artificial block ore output<br>China Nonferrous Metal Yearbook, Table: Non-ferrous metal output by region<br>China Building Materials Industry Yearbook, Table: Major building materials products output<br>China Chemical Industry Yearbook, Table 8: Major products output<br>China's Environmental Statistics (not publicly released)<br>Industrial investigation (not publicly released) |
| Solvent                | Solvent consumption       | China Light Industry Yearbook, Table 2: Major products output<br>China Paint Industry Yearbook, section 3: Architectural coatings market review and development trend outlook<br>China Coating Industry Association dataset: <a href="https://www.chinacoatingnet.com/index2.php">https://www.chinacoatingnet.com/index2.php</a> (last access: 8 November 2022)<br>China adhesives and tape industry association dataset: <a href="https://www.catia-china.com/">https://www.catia-china.com/</a> (last access: 8 November 2022)                                                                                         |

---

|                                |                          |                                                                                                                                                                                                        |
|--------------------------------|--------------------------|--------------------------------------------------------------------------------------------------------------------------------------------------------------------------------------------------------|
| Oil storage and transportation | Oil production and sales | China Energy Statistical Yearbook, Table 3-5: Gasoline production by region; Table 3-6: Diesel production by region                                                                                    |
| Waste treatment                | Waste disposal volume    | China Environmental Statistical Yearbook, Table 10-6: Municipal wastewater discharge and treatment by region, Table 10-7: Urban appearance and environmental health by region                          |
| Agriculture                    | Livestock stocking       | Chinese Animal Husbandry and Veterinary Yearbook, Table: Annual slaughter of major livestock by region, Table: Annual stock of major livestock by region                                               |
|                                | Fertilizer application   | China Rural Statistical Yearbook, Table 3-6: Chemical fertilizer application amount by region<br>Compendium of cost and income data of national agricultural products, Table: Fertilizer input by crop |

---

a: All data collected from national yearbooks can be retrieved from the official website of National Bureau of Statistics: <https://data.stats.gov.cn/english/>, last access: 25 April 2023.

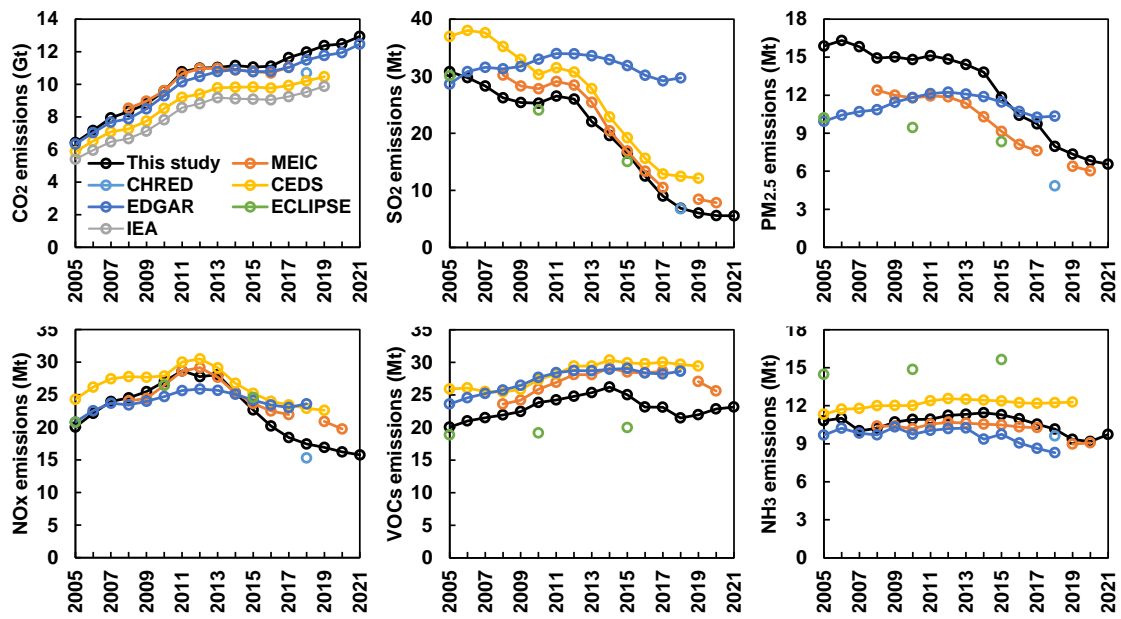

Figure R1 (Figure S1 in supplement\_R1): Comparison of China's emission inventories compiled in this study and in other studies.
