# Supplementary material for: Emission trends of air pollutants and CO 2 in China from 2005 to 2021
Source: Copernicus journal article supplement (doi:10.5194/essd-2022-464), 2023-01-10
Supplement: Supplementary file [file essd-2022-464-AC3-supplement.pdf]

**Dear reviewer,**

Thanks a lot for your recognition and the valuable suggestions!

**This file shows all the revised figures and supplementary table mentioned in the response text.**

All the corrections and responses will be incorporated into the new revised manuscript (manuscript\_R1). If further responses and corrections should be made, please don't hesitate to let me know.

Yours Sincerely

Corresponding author

Prof. Shuxiao Wang

School of Environment, Tsinghua University

Beijing 100084, P.R. China

Tel & Fax: 86-10-6277-1466

E-mail: [shxwang@tsinghua.edu.cn](mailto:shxwang@tsinghua.edu.cn)

**Table caption list**

Table R1: Comparison of research contents among similar studies.

**Figure caption list**

Figure R1 (Figure 6 in manuscript\_R1): City's ratios and their change rates of air pollutant emission to CO<sub>2</sub> emission during 2013–2021 in China.

Figure R2 (Figure 9 in manuscript\_R1): Emission contributions from different types of transport facilities in 2021 in China.

Table R1: Comparison of research contents among similar studies.

| Elements         |                                 | This study                                                              | Zheng et al. (2018) | Gao et al. (2022)   | Zhang et al. (2022)                                         |
|------------------|---------------------------------|-------------------------------------------------------------------------|---------------------|---------------------|-------------------------------------------------------------|
| Dataset          |                                 | ABaCAS-EI                                                               | MEIC                | CHRED 3.0A          | China Environment Yearbook, CHRED                           |
| Time             |                                 | 2005-2021                                                               | 2010-2017           | 2018                | 2012-2018                                                   |
| Spatial scale    |                                 | province<br>city                                                        | nation              | city<br>grid (10km) | city                                                        |
| Sector           |                                 | 15 subsectors                                                           | 5 sectors           | 21 subsectors       | NA                                                          |
| Historical trend | reduction measures              | structure adjustment<br>energy & material saving<br>end-of-pipe control | end-of-pipe control | NA                  | energy use<br>technological progress<br>end-of-pipe control |
|                  | co-control achievement          | sector<br>province/city                                                 | NA                  | NA                  | city                                                        |
| Future priority  | potential synergistic reduction | sector<br>province/city<br>measure                                      | NA                  | grid                | measure                                                     |

NA: not analyzed

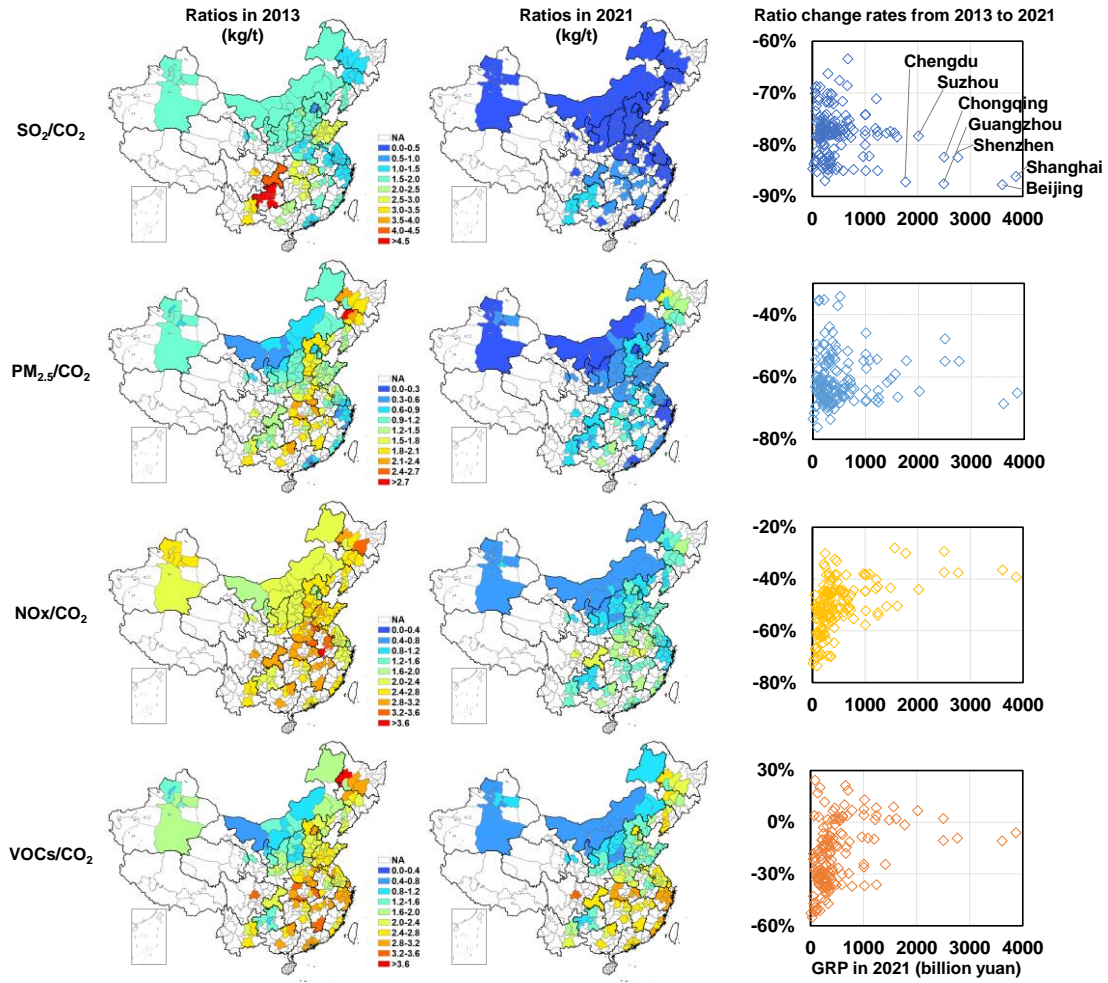

Figure R1 (Figure 6 in manuscript\_R1): City's ratios and their change rates of air pollutant emission to CO<sub>2</sub> emission during 2013–2021 in China. (NA: data not analyzed; GRP: Gross Regional Product)

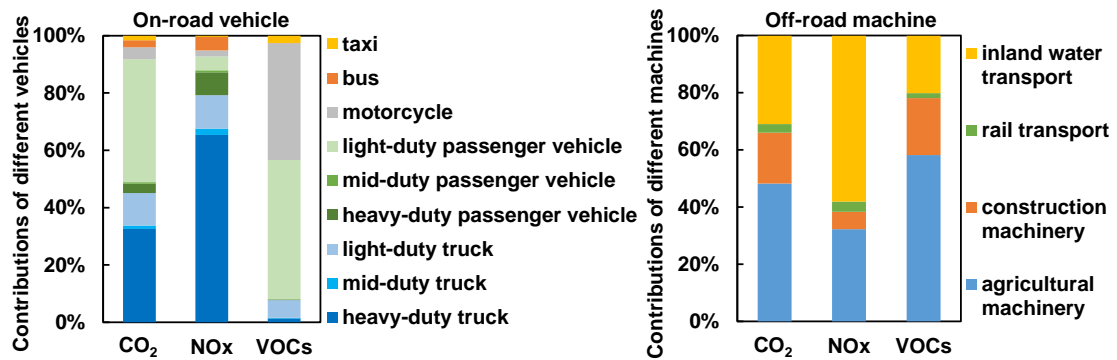

Figure R2 (Figure 9 in manuscript\_R1): Emission contributions from different types of transport facilities in 2021 in China.

## References

- Gao, Y., Zhang, L., Huang, A., Kou, W., Bo, X., Cai, B., and Qu, J.: Unveiling the spatial and sectoral characteristics of a high-resolution emission inventory of CO<sub>2</sub> and air pollutants in China, *Sci. Total Environ.*, 847, 157623, <https://doi.org/10.1016/j.scitotenv.2022.157623>, 2022.
- Zhang, Q.-Y., Cai, B.-F., Wang, M.-D., Wang, J.-X., Xing, Y.-K., Dong, G.-X., Zhang, Z., and Mao, X.-Q.: City level CO<sub>2</sub> and local air pollutants co-control performance evaluation: A case study of 113 key environmental protection cities in China, *Advances in Climate Change Research*, 13, 118-130, [10.1016/j.accre.2021.10.002](https://doi.org/10.1016/j.accre.2021.10.002), 2022.
- Zheng, B., Tong, D., Li, M., Liu, F., Hong, C., Geng, G., Li, H., Li, X., Peng, L., Qi, J., Yan, L., Zhang, Y., Zhao, H., Zheng, Y., He, K., and Zhang, Q.: Trends in China's anthropogenic emissions since 2010 as the consequence of clean air actions, *Atmos. Chem. Phys.*, 18, 14095-14111, <https://doi.org/10.5194/acp-18-14095-2018>, 2018.
